# Supplementary material for: Impacts on and damage to European forests from the 2018–2022 heat and drought events
Source: Copernicus journal article supplement (doi:10.5194/nhess-25-77-2025), 2025-01-06
Supplement: Supplementary file 1 [file nhess-25-77-2025-supplement.pdf]

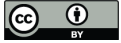

*Supplement of*

## **Impacts on and damage to European forests from the 2018–2022 heat and drought events**

**Florian Knutzen et al.**

*Correspondence to:* Florian Knutzen ([florian.knutzen@hereon.de](mailto:florian.knutzen@hereon.de))

The copyright of individual parts of the supplement might differ from the article licence.

## Supplement

**Table S1:** Differences between the study period 2018-2022 (18-22) to reference period 2010-2014 (10-14), where available. Denoted next to the higher average value ( $\bar{x}$ ) in each cell are the results of the statistical tests: n.a. (not applicable), n.s. (not significant), \* significant ( $p < 0.05$ ), \*\* highly significant ( $p < 0.01$ ), \*\*\* very highly significant ( $p < 0.001$ ). Although we found significant differences in crown defoliation of broadleaf trees for the northern zone, these results are not considered valid as the datasets used do not include the same countries in both groups. Consequently, no significant differences can be reliably demonstrated.

| Zone     | Crown defoliation [%]                                                         |                                                                                    | Damaged wood by insects [1000m <sup>3</sup> ]                                     | Burnt forest area [ha]                                                               | Tree cover loss [%]                                                         |
|----------|-------------------------------------------------------------------------------|------------------------------------------------------------------------------------|-----------------------------------------------------------------------------------|--------------------------------------------------------------------------------------|-----------------------------------------------------------------------------|
|          | Broadleaves                                                                   | Conifers                                                                           |                                                                                   |                                                                                      |                                                                             |
| Northern | $\bar{x}$ (10-14) = 23.3<br>n = 7<br>$\bar{x}$ (18-22) = 51.9**<br>n = 3      | $\bar{x}$ (10-14) = 16.9<br>(n.s.)<br>n = 16<br>$\bar{x}$ (18-22) = 15.9<br>n = 10 | n.a.                                                                              | $\bar{x}$ (10-14) = 884.12<br>n = 20<br>$\bar{x}$ (18-22) = 1750.8 (n.s.)<br>n = 25  | $\bar{x}$ (10-14) = 0.70<br>n = 25<br>$\bar{x}$ (18-22) = 1.05***<br>n = 25 |
| Central  | $\bar{x}$ (10-14) = 31.29<br>n = 30<br>$\bar{x}$ (18-22) = 37.11***<br>n = 30 | $\bar{x}$ (10-14) = 27.9<br>n = 23<br>$\bar{x}$ (18-22) = 35.29**<br>n = 24        | $\bar{x}$ (10-14) = 739.22<br>n = 20<br>$\bar{x}$ (18-22) = 11507.67***<br>n = 31 | $\bar{x}$ (10-14) = 1655.1<br>n = 27<br>$\bar{x}$ (18-22) = 1991.1 (n.s.)<br>n = 38  | $\bar{x}$ (10-14) = 0.39<br>n = 40<br>$\bar{x}$ (18-22) = 0.76**<br>n = 40  |
| Alpine   | n.a.                                                                          | n.a.                                                                               | n.a.                                                                              | $\bar{x}$ (10-14) = 62.3<br>n = 10<br>$\bar{x}$ (18-22) = 110.6<br>(n.s.)<br>n = 10  | n.a.                                                                        |
| Southern | $\bar{x}$ (10-14) = 26.25<br>n = 10<br>$\bar{x}$ (18-22) = 34.83*<br>n = 9    | $\bar{x}$ (10-14) = 20.02<br>n = 8<br>$\bar{x}$ (18-22) = 26.99**<br>n = 8         | n.a.                                                                              | $\bar{x}$ (10-14) = 41510<br>n = 15<br>$\bar{x}$ (18-22) = 50630<br>(n.s.)<br>n = 15 | $\bar{x}$ (10-14) = 0.57<br>n = 15<br>$\bar{x}$ (18-22) = 0.87*<br>n = 15   |
